# Supplementary material for: Estimating the social burden of COVID-19 among caregivers of COVID-19 patients in punjab, pakistan
Source: PubMed Central journal article supplement — Sci Rep. 2024 Nov 28;14:29614. doi: 10.1038/s41598-024-74613-z (PMC11604926; doi:10.1038/s41598-024-74613-z), 2024-11-28
Supplement: 41598_2024_74613_MOESM1_ESM.pdf [file 41598_2024_74613_MOESM1_ESM.pdf]

**Estimation of Social Burden on Caregivers of COVID-19 Patients in Punjab-Pakistan**

پنجاب-پاکستان میں COVID-19 مریضوں کی دیکھ بھال کرنے والوں پر سماجی بوجھ کا تخمینہ

**Consent Letter (English Version)**

**Dear Respondent**

Greetings,

We request your consent to collect data for our research titled *“Estimation of Social Burden of Caregivers of COVID-19 Patients in Punjab-Pakistan”*. It aims to estimate the impact of COVID-19 on caregivers.

Your participation in this study is voluntary. You may choose not to participate or to withdraw from the study at any time without any penalty or loss of benefits to which you are otherwise entitled.

The collected data will be kept confidential and used only for this research project. Your personal information will be kept securely and will only be accessible to the research team. The data collected will be de-identified so that it cannot be linked back to you.

Your participation in this study will help us to estimate how covid-19 affects caregivers in Pakistan. The study will be helpful for health practitioners and policymakers to formulate suitable plans to be followed by government and private organizations to support the caregivers of these infectious disease patients to reduce their financial, social and psychological burden of the disease.

If you have any questions or concerns about the research, please do not hesitate to contact the interviewer. If you agree to participate in this research project, please sign below to indicate your consent.

Thank you for considering participating in this research project.

Sincerely,

**Ms. Shumaila Abbas**  
Research Scholar

I have read and understood the above information and voluntarily agree to participate in this research project.

Participant Signature: \_\_\_\_\_

Print Name: \_\_\_\_\_

Date: \_\_\_\_\_

## رضامندی کا خط - Consent Letter

محترم جواب دہندہ  
سلام،

ہم اپنے تحقیقی منصوبے، "پنجاب-پاکستان میں COVID-19 کے مریضوں کی دیکھ بھال کرنے والوں پر سماجی بوجھ کا تخمینہ" کے لیے ڈیٹا جمع کرنے کے لیے آپ کی رضامندی کی درخواست کرتے ہیں۔ اس کا مقصد دیکھ بھال کرنے والوں پر COVID-19 کے اثرات کا اندازہ لگانا ہے۔

اس مطالعہ میں آپ کی شرکت رضاکارانہ ہے۔ آپ کسی بھی وقت بغیر کسی جرمانے یا فوائد و نقصان کے، جس کے آپ حقدار ہیں اس میں حصہ نہ لینے یا اس سے دستبردار ہونے کا انتخاب کر سکتے ہیں۔

جمع کردہ ڈیٹا کو خفیہ رکھا جائے گا اور صرف اس تحقیقی منصوبے کے لیے استعمال کیا جائے گا۔ آپ کی ذاتی معلومات کو محفوظ رکھا تاکہ اسے آپ سے جانے گا اور یہ صرف تحقیقی ٹیم کے لیے قابل رسائی ہو گی۔ جمع کیے گئے ڈیٹا کی شناخت ختم کر دی جائے گی دوبارہ منسلک نہ کیا جا سکے۔

اس مطالعہ میں آپ کی شرکت سے ہمیں یہ اندازہ لگانے میں مدد ملے گی کہ کورونا پاکستان میں دیکھ بھال کرنے والوں کو کس طرح متاثر کرتا ہے۔ یہ مطالعہ ہیلتھ پریکٹیشنرز اور پالیسی سازوں کے لیے حکومتی اور پرائیویٹ تنظیموں کی جانب سے ان متعدی بیماری کے مریضوں کی دیکھ بھال کرنے والوں کی مدد کرنے میں ان کے مالی، سماجی اور نفسیاتی بوجھ کو کم کرنے کے لیے مناسب منصوبے مرتب کرنے میں مددگار ثابت ہوگا۔

اگر آپ کو تحقیق کے بارے میں کوئی سوالات یا خدشات ہیں، تو براہ کرم انٹرویو لینے والے سے رابطہ کرنے میں سنجوچ نہ کریں۔

اگر آپ اس تحقیقی منصوبے میں حصہ لینے پر اتفاق کرتے ہیں، تو براہ کرم اپنی رضامندی ظاہر کرنے کے لیے نیچے دستخط کریں۔

اس تحقیقی منصوبے میں حصہ لینے پر غور کرنے کے لیے آپ کا شکریہ۔

مخلص

شمانلہ عباس

ریسرچ اسکالر

میں نے مندرجہ بالا معلومات کو پڑھ اور سمجھ لیا ہے اور میں نے رضاکارانہ طور پر اس تحقیقی منصوبے میں حصہ لینے پر رضامندی ظاہر کی ہے۔

شرکت کنندہ کے دستخط: \_\_\_\_\_

نام: \_\_\_\_\_

تاریخ: \_\_\_\_\_

**Demographics (آبادیاتی معلومات)**

Caregiver (دیکھ بھال کرنے والا)

1. Gender (جنس):  Male مرد  Female عورت
2. Age (عمر): \_\_\_\_\_ (سال years)
3. Relationship of Caregiver with Care Recipient: (دیکھ بھال کرنے والے کا نگہداشت وصول کنندہ کے ساتھ رشتہ)  
 Children کوئی اور اور  Spouses میاں / بیوی  Parents والد / والدہ  Siblings بہن / بھائی  Others بیٹا / بیٹی
4. Residential Area (رہائشی علاقے):  Urban شہری  Rural دیہی
5. Marital Status (ازدواجی حیثیت):  Married شادی شدہ  Single اکیلا
6. Occupational Status (پیشہ ورانہ حیثیت):  Employed ملازم  Unemployed بے روزگار
7. Monthly Family Income (in Rs.): (ماہانہ خاندانی آمدنی (روپے میں))  
 Less than 30,000  30,000-60,000  60,000-90,000  More than 90,000
8. Education (تعلیم):  Illiterate  Under Matric  Matriculation  Intermediate  Bachelor  Masters & Above
9. Family Size (خاندان کے افراد):  < 2  2 – 4  5 – 7  > 7
10. Family Type (خاندانی قسم):  Joint مشترکہ  Nuclear انفرادی
11. How would you rate your health? (آپ اپنی صحت کی درجہ بندی کیسے کریں گے؟)  
 Excellent بہترین  Very Good بہت اچھی  Good اچھی  Fair نسبتاً بہتر  Poor خراب
12. Caregiver-Care Recipient Living Situation (دیکھ بھال کرنے والے اور وصول کنندہ کی رہائشی صورت حال)  
 Same home ایک ہی گھر  ≤ 15 minutes 15 منٹ سے بھی کم فاصلے پر  > 15 minutes 15 منٹ سے زیادہ دور

13. Types of care provided? (دیکھ بھال کی اقسام؟)

|                                    | Yes (ہاں)             | No (نہیں)             |                                                | Yes (ہاں)             | No (نہیں)             |                                                | Yes (ہاں)             | No (نہیں)             |
|------------------------------------|-----------------------|-----------------------|------------------------------------------------|-----------------------|-----------------------|------------------------------------------------|-----------------------|-----------------------|
| 13A. Household tasks<br>گھریلو کام | <input type="radio"/> | <input type="radio"/> | 13B. Personal care task<br>ذاتی نگہداشت کے کام | <input type="radio"/> | <input type="radio"/> | 13C. Medical/nursing tasks<br>طبی/نرسنگ کے کام | <input type="radio"/> | <input type="radio"/> |

14. Financial support during the COVID-19 period (کی مدت کے دوران مالی مدد):

|                                                                    | Yes (ہاں)             | No (نہیں)             |                                                                           | Yes (ہاں)             | No (نہیں)             |
|--------------------------------------------------------------------|-----------------------|-----------------------|---------------------------------------------------------------------------|-----------------------|-----------------------|
| 14A. Salary/Business earning/Pension<br>تنخواہ/کاروباری آمدنی/پنشن | <input type="radio"/> | <input type="radio"/> | 14C. Support from friends and family<br>دوستوں اور خاندان کی طرف سے تعاون | <input type="radio"/> | <input type="radio"/> |
| 14B. Loan<br>قرض                                                   | <input type="radio"/> | <input type="radio"/> | 14D. No source<br>کوئی ذریعہ نہیں۔                                        | <input type="radio"/> | <input type="radio"/> |

15. What COPING STRATEGIES you practiced during the caregiving period?

نگہداشت کی مدت کے دوران آپ نے مقابلہ کرنے کی کون سی حکمت عملیوں پر عمل کیا۔

|                                                                                 | Yes (ہاں)             | No (نہیں)             |                                                                    | Yes (ہاں)             | No (نہیں)             |
|---------------------------------------------------------------------------------|-----------------------|-----------------------|--------------------------------------------------------------------|-----------------------|-----------------------|
| 15A. Exercise.<br>ورزش                                                          | <input type="radio"/> | <input type="radio"/> | 15G. Watching movies/Drama.<br>فلمیں / ڈرامہ دیکھنا                | <input type="radio"/> | <input type="radio"/> |
| 15B. Playing video game.<br>ویڈیو گیم کھیلا                                     | <input type="radio"/> | <input type="radio"/> | 15H. Spending time with family<br>فیملی کے ساتھ وقت گزارنا         | <input type="radio"/> | <input type="radio"/> |
| 15C. Having good sleep.<br>اچھی نیند لینا                                       | <input type="radio"/> | <input type="radio"/> | 15I. Spend time on Social Media.<br>سوشل میڈیا پر وقت گزارنا۔      | <input type="radio"/> | <input type="radio"/> |
| 15D. Reading.<br>پڑھنا                                                          | <input type="radio"/> | <input type="radio"/> | 15J. Seeking spiritual support<br>روحانی سہارا تلاش کرنا           | <input type="radio"/> | <input type="radio"/> |
| 15E. Eating healthy food.<br>صحت مند کھانا کھانا                                | <input type="radio"/> | <input type="radio"/> | 15K. Spend time on hobbies.<br>مشاغل پر وقت گزارنا                 | <input type="radio"/> | <input type="radio"/> |
| 15F. Contributing in social welfare work.<br>سماجی بہبود کے کاموں میں حصہ ڈالنا | <input type="radio"/> | <input type="radio"/> | 15L. Talking to friends on the phone.<br>دوستوں سے فون پر بات کرنا | <input type="radio"/> | <input type="radio"/> |

16. Overall, on average, how much time did you spend providing care to the patient in a day? \_\_\_\_\_ (hours)  
 مجموعی طور پر، اوسطاً، آپ نے ایک دن میں مریض کی دیکھ بھال میں کتنا وقت صرف کیا؟ \_\_\_\_\_ (گھنٹے)
17. Overall, on average, how much you have lost due to absentees from work during the caregiving period. \_\_\_\_\_ (Rs./day).  
 مجموعی طور پر، نگہداشت کی مدت کے دوران کام سے غیر حاضر ہونے کی وجہ سے آپ نے اوسطاً کتنا نقصان اٹھایا ہے۔  
 No. of days. \_\_\_\_\_ دنوں کی تعداد۔  
 \_\_\_\_\_ (روپے یومیہ) \_\_\_\_\_

**Please read the following items related to the Social Burden of the disease and select the appropriate option.**

براہ کرم بیماری کے سماجی بوجھ سے متعلق درج ذیل آئٹمز کو پڑھیں اور مناسب آپشن کا انتخاب کریں۔

|     |                                                                                                                                                                                                                                                                                                                                                     | Yes<br>ہاں            | No<br>نہیں            |
|-----|-----------------------------------------------------------------------------------------------------------------------------------------------------------------------------------------------------------------------------------------------------------------------------------------------------------------------------------------------------|-----------------------|-----------------------|
| 1.  | Due to caregiving, I feel that I am missing out on life-بہال کی وجہ سے، مجھے لگتا ہے کہ میں زندگی سے محروم ہو رہا ہوں۔                                                                                                                                                                                                                              | <input type="radio"/> | <input type="radio"/> |
| 2.  | Due to caregiving, I wish I could escape from this situation.<br>دیکھ بہال کی وجہ سے، میری خواہش ہے کہ میں اس صورت حال سے بچ جاؤں۔                                                                                                                                                                                                                  | <input type="radio"/> | <input type="radio"/> |
| 3.  | Due to caregiving, My social life has suffered.<br>دیکھ بہال کی وجہ سے، میری سماجی زندگی کو نقصان پہنچا ہے۔                                                                                                                                                                                                                                         | <input type="radio"/> | <input type="radio"/> |
| 4.  | I feel emotionally drained due to caring for my care receiver.<br>میں اپنے کیئر ریسیور کی دیکھ بہال کرنے کی وجہ سے جذباتی طور پر سوکھا ہوا محسوس کرتا ہوں۔                                                                                                                                                                                          | <input type="radio"/> | <input type="radio"/> |
| 5.  | I expected that things would be different at this point in my life.<br>مجھے امید تھی کہ میری زندگی میں اس وقت چیزیں مختلف ہوں گی۔                                                                                                                                                                                                                   | <input type="radio"/> | <input type="radio"/> |
| 6.  | I don't get along with other family members as well as I used to.<br>میں خاندان کے دوسرے افراد کے ساتھ اس طرح نہیں ملتا جیسا کہ میں کرتا تھا۔                                                                                                                                                                                                       | <input type="radio"/> | <input type="radio"/> |
| 7.  | Others don't appreciate my caregiving efforts in my family.<br>دوسرے میرے خاندان میں میری دیکھ بہال کی کوششوں کی تعریف نہیں کرتے۔                                                                                                                                                                                                                   | <input type="radio"/> | <input type="radio"/> |
| 8.  | I don't do as well at work as I used to.<br>میں کام میں اتنا اچھا نہیں کرتا جیسا کہ میں کرتا تھا۔                                                                                                                                                                                                                                                   | <input type="radio"/> | <input type="radio"/> |
| 9.  | I feel resentful of other relatives who could but did not help.<br>میں دوسرے رشتہ داروں سے ناراضگی محسوس کرتا ہوں جو مدد کر سکتے تھے لیکن مدد نہیں کرتے تھے۔                                                                                                                                                                                        | <input type="radio"/> | <input type="radio"/> |
| 10. | I don't have the time to see friends and family.<br>میرے پاس دوستوں اور کنبہ والوں سے ملنے کا وقت نہیں ہے۔                                                                                                                                                                                                                                          | <input type="radio"/> | <input type="radio"/> |
| 11. | I may also grapple with anxiety, depression, disappointment and loneliness because of reduced social interactions.<br>سماجی میل جول کم ہونے کی وجہ سے میں بے چینی، ڈپریشن، مایوسی اور تنہائی کا شکار بھی ہو سکتا ہوں۔                                                                                                                               | <input type="radio"/> | <input type="radio"/> |
| 12. | Social relationships are disrupted not only for patients but also for their caregivers.<br>سماجی تعلقات نہ صرف مریضوں بلکہ ان کی دیکھ بہال کرنے والوں کے لیے بھی متاثر ہوئے ہیں۔                                                                                                                                                                    | <input type="radio"/> | <input type="radio"/> |
| 13. | I felt socially deprived because my friends and family members avoided connecting with me because they thought the caregivers might be disease carriers.<br>میں نے سماجی طور پر محرومی محسوس کی کیونکہ میرے دوست اور خاندان کے افراد نے مجھ سے رابطہ قائم کرنے سے گریز کیا کیونکہ ان کا خیال تھا کہ دیکھ بہال کرنے والے بیماری کے حامل ہو سکتے ہیں۔ | <input type="radio"/> | <input type="radio"/> |
| 14. | I can't go out, and it's not safe for others to come in.<br>میں باہر نہیں جا سکتا، اور دوسروں کا اندر آنا محفوظ نہیں ہے۔                                                                                                                                                                                                                            | <input type="radio"/> | <input type="radio"/> |
| 15. | Being isolated alone, negativity impacts my mental health.<br>تنہا رہنے کی وجہ سے منفی میری ذہنی صحت کو متاثر کرتی ہے۔                                                                                                                                                                                                                              | <input type="radio"/> | <input type="radio"/> |
| 16. | The amount and quality of information on social media negatively affect my social life.<br>سوشل میڈیا پر معلومات کی مقدار اور معیار میری سماجی زندگی کو منفی طور پر متاثر کرتا ہے۔                                                                                                                                                                  | <input type="radio"/> | <input type="radio"/> |
| 17. | I panicked more during the pandemic when listening to the news.<br>خبریں سن کر میں وبائی مرض کے دوران زیادہ گھبرا گیا۔                                                                                                                                                                                                                              | <input type="radio"/> | <input type="radio"/> |
| 18. | Events, parties, functions, festivals and gatherings decrease depression and anxiety.<br>تقریبات، پارٹیاں، تقریب، تہوار اور اجتماعات ڈپریشن اور بے چینی کو کم کرتے ہیں۔                                                                                                                                                                             | <input type="radio"/> | <input type="radio"/> |
| 19. | I suffered from emotional distress during the care period.<br>میں نگہداشت کی مدت کے دوران جذباتی پریشانی کا شکار تھا۔                                                                                                                                                                                                                               | <input type="radio"/> | <input type="radio"/> |
| 20. | Social distancing badly affected my social life.<br>سماجی دوری نے میری سماجی زندگی کو بری طرح متاثر کیا۔                                                                                                                                                                                                                                            | <input type="radio"/> | <input type="radio"/> |
| 21. | I avoid visiting hospitals for fear of mass panic/ suspicion of getting infected.<br>میں بڑے ہسپتالوں پر گھبراہٹ/انفکشن ہونے کے شبہ کے خوف سے ہسپتال جانے سے گریز کرتا ہوں۔                                                                                                                                                                         | <input type="radio"/> | <input type="radio"/> |
| 22. | I feel excessive fear and worry about my own health and the health of my family members.<br>میں اپنی صحت اور اپنے خاندان کے افراد کی صحت کے بارے میں بہت زیادہ خوف اور فکر محسوس کرتا ہوں۔                                                                                                                                                          | <input type="radio"/> | <input type="radio"/> |

Thank you 😊

آپ کے تعاون کا شکریہ - 😊
